# Supplementary material
Source: Springer Nature journal article supplement (http://www.springermedizin.de/resource/supplementary/13014_2013_1057_MOESM4_ESM.pdf/9635220)

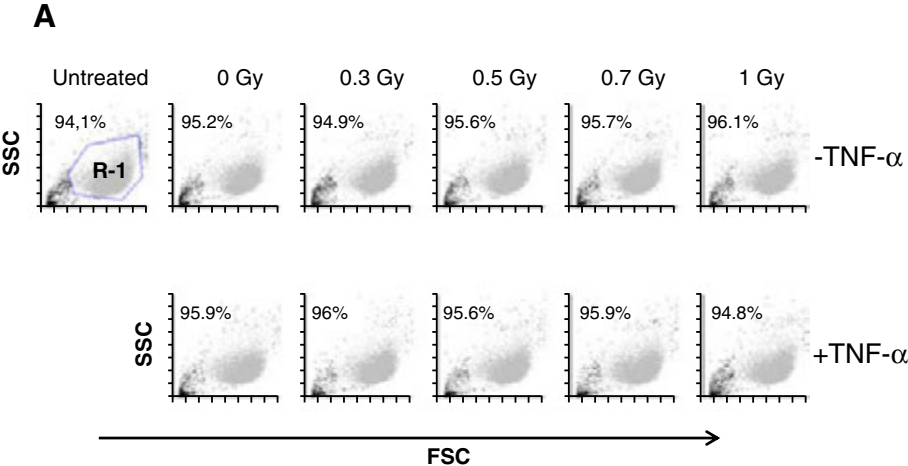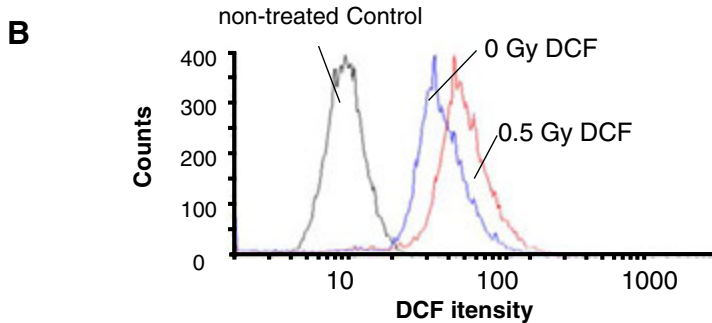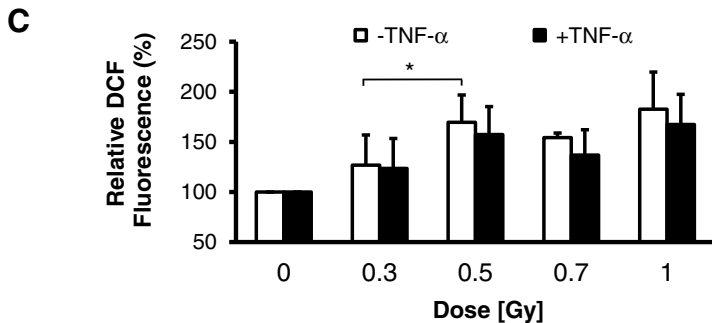

Supplement: MOESM4 [file 9635220]
